## SPOTLIGHT

# Non-traditional roles of immune cells in regeneration: an evolutionary perspective

Beryl N. Arinda<sup>1,2,\*</sup>, Yacoub A. Innabi<sup>1,2,\*</sup>, Juris A. Grasis<sup>1,3,‡</sup> and Néstor J. Oviedo<sup>1,3,‡</sup>

## ABSTRACT

Immune cells are known to engage in pathogen defense. However, emerging research has revealed additional roles for immune cells, which are independent of their function in the immune response. Here, we underscore the ability of cells outside of the adaptive immune system to respond to recurring infections through the lens of evolution and cellular memory. With this in mind, we then discuss the bidirectional crosstalk between the immune cells and stem cells and present examples where these interactions regulate tissue repair and regeneration. We conclude by suggesting that comprehensive analyses of the immune system may enable biomedical applications in stem cell biology and regenerative medicine.

**KEY WORDS:** Stem cells, Regeneration, Innate immunity, Trained immunity, Macrophages, Hemocytes, Homeostasis

## Introduction

The immune system is traditionally viewed as a defense against infection (Nicholson, 2016). Research from the past 20 years, and particularly more recently, has revealed that immune cells are involved in more than just the fight against germs. New and exciting interactions, such as crosstalk between stem cells and immune cells, are being explored. Such interactions are observed in the development, homeostasis, or post-inflammatory regeneration of tissues across evolution. Here, we describe the evolution of adaptive immune-like responses (trained immunity) in cell types outside of the adaptive immune system. We then tackle the reverse observation: how immune cells perform non-immune functions related to regeneration and stem cell regulation. We hope to convey a broader consideration of the types of immune responses and non-immune functions of traditional immune cells in the context of regeneration and evolution.

## Evolution of trained immunity

Host immunity is typically divided into innate and adaptive components. The innate immune system includes the activity of myeloid cells, such as macrophages, that react quickly to infection with non-specific responses, such as phagocytosis (Wynn and Vannella, 2016). When the innate immune response is insufficient to clear the infection, the adaptive immune system generates an antigen-specific response, as well as long-term immunological

memory that allows rapid response upon reinfection of the antigen (Farber et al., 2016). Because adaptive immunity is a recent evolutionary trait, likely originating from jawless vertebrates (Pancer et al., 2004; Boehm and Swann, 2014), most studies on immune memory focus on recently evolved animals. In evolutionary terms, this would imply that no adaptive or memory-like traits would have existed before jawless vertebrates, nor would they exist in organisms with only innate immunity. This is an immunological fallacy. There is ample evidence of innate immune memory occurring from plants and invertebrates to innate immune cells in mammals (Pradeu and Du Pasquier, 2018; Netea et al., 2019).

To understand the non-immune functions of immune cells, we must consider that immunity occurs throughout evolution and that many other cells, in addition to dedicated immune cells, have forms of immunity. One example is trained immunity, which involves epigenetic mechanisms (such as DNA methylation and chromatin reorganization) to provide persistent functional reprogramming in response to a pathogenic signal. As a result, subsequent responses to recurring pathogenic signals are enacted with more (or less) vigor depending on the context (Fanucchi et al., 2021). For example, trained cells may react more passively to antigens that are consistently present in the environment but will escalate the response to a recurring pathogenic antigen. Therefore, it is important to consider that the evolution of immunity not only requires the ability to recognize foreign antigens but to distinguish between them and react appropriately. Although trained immunity to reinfection has been well-documented in plants ('systemic acquired resistance'; Kachroo and Robin, 2013), we focus here on trained immunity in animals (Table 1).

## Diploblastic species

Evidence of trained immunity has been documented in sponges (Hildemann et al., 1979), whereby transplanted sponge tissue from a donor of one species is rejected by the host from another species. Rejection occurs more rapidly when the host is exposed to the same donor tissue again later. A similar response has been seen within corals (Hildemann et al., 1977). These examples show that trained immunity concepts are likely to have been employed from the start of animal evolution and need to be explored further.

## Protostomes

Within the protostome lineage, evidence for trained immunity is far-ranging. The platyhelminth *Schmidtea mediterranea* clears recurring *Staphylococcus aureus* infections much faster than the original infection through the activation of the peptidoglycan receptor *Smed-PGRP-2* (Torre et al., 2017). *Caenorhabditis elegans* has a conditioned behavior to pathogenic bacteria; the animal avoids pathogens already encountered through the activation of the Toll-like receptor (TLR) pathway (Zhang et al., 2005). *Drosophila* and mosquito (*Anopheles gambiae*) have each shown specific responses

<sup>1</sup>Department of Molecular and Cell Biology, University of California, Merced, CA 95343, USA. <sup>2</sup>Quantitative and Systems Biology Graduate Program, University of California, Merced, CA 95343, USA. <sup>3</sup>Health Sciences Research Institute, University of California, Merced, CA 95343, USA.

\*These authors contributed equally to this work

‡Authors for correspondence (jagras@ucmerced.edu; noviedo2@ucmerced.edu)

© B.N.A., 0000-0001-9249-0120; Y.A.I., 0000-0002-5294-1254; J.A.G., 0000-0002-3945-0135; N.J.O., 0000-0002-0213-9781

**Table 1. Animals and specialized cells with regenerative ability and associated immune components**

| Species           | Immune cell(s)                                    | Stem cells (organ)                                | Immune-associated mediators                                                        | Mechanisms mediated by macrophage or macrophage-like cells                                      | References                                                                                                                                                                  |
|-------------------|---------------------------------------------------|---------------------------------------------------|------------------------------------------------------------------------------------|-------------------------------------------------------------------------------------------------|-----------------------------------------------------------------------------------------------------------------------------------------------------------------------------|
| <i>Hydra</i>      | Epithelial cells                                  | Interstitial stem cells (whole organism)          | TLRs; BMPs; NF- $\kappa$ B; RIG-I receptors<br>Wnt signaling                       | Axial patterning; embryogenesis                                                                 | Reinhardt et al., 2004; Broun et al., 2005; Bosch et al., 2009; Lange et al., 2011; Bosch, 2014; Wenger et al., 2014; Schröder and Bosch, 2016                              |
| Planaria          | Reticular cells; intestinal phagocytes; neoblasts | Neoblasts (whole organism)                        | TFs; TLRs; TAK1/MKKK/p38; PGRP2; NF- $\kappa$ B<br>RIG-I receptors; C-type lectins | Tissue regeneration; bacterial and fungal infections                                            | Abnave et al., 2014; Peiris, et al., 2014; Arnold et al., 2016; Gao et al., 2017a,b; Pang et al., 2017; Torre et al., 2017; Maciel et al., 2019, 2020; Kangale et al., 2021 |
| Earthworms        | Coelomocytes                                      | Cerebral ganglia (brain)                          | Riboflavin                                                                         | Neurogenesis                                                                                    | Molnar et al., 2015                                                                                                                                                         |
| Crayfish          | Hemocytes                                         | Neuronal precursors (nervous system)              | TFs                                                                                | Neurogenesis                                                                                    | Benton et al., 2014                                                                                                                                                         |
| Mollusks          | Hemocytes                                         | Neuronal precursors (blastema)                    | LPS; TFs (e.g. SOX2)                                                               | Embryonic development; stem cell pluripotency; tissue homeostasis                               | Zhang and Cui, 2014                                                                                                                                                         |
| <i>Drosophila</i> | Hemocytes                                         | Unspecified mutant stem cells (imaginal discs)    | TLRs                                                                               | Cell competition                                                                                | Meyer et al., 2014; Alpar et al., 2018                                                                                                                                      |
|                   |                                                   | Müller glia (retina)                              | Manf                                                                               | Regeneration; retinal repair                                                                    | Neves et al., 2016                                                                                                                                                          |
|                   |                                                   | ISCs (mid-gut)                                    | Dpp                                                                                | Proliferation; maintenance of basal stem cell activity                                          | Ayyaz et al., 2015                                                                                                                                                          |
|                   |                                                   | GSCs (ovaries)                                    | Dpp                                                                                | Assembly; homeostasis                                                                           | Chen and McKearin, 2003; Van De Bor et al., 2015                                                                                                                            |
| Salamander        | Macrophages                                       | Glial cells (nervous system)                      | Drpr                                                                               | Proliferation                                                                                   | Losada-Pérez et al., 2021                                                                                                                                                   |
|                   |                                                   | Blastema cells (limbs); myeloid cells (retina)    | TGF $\beta$ 1                                                                      | Vascularization; regeneration                                                                   | Henry and Tsonis, 2010; Godwin et al., 2013; Zhao et al., 2016; Arenas Gómez et al., 2020                                                                                   |
| Zebrafish         | Macrophages                                       | Glial cells (retina); blastema cells (caudal fin) | TFs                                                                                | Dedifferentiation; proliferation; regeneration kinetics; patterning, branching and bone quality | Wan and Goldman, 2016; Petrie et al., 2014                                                                                                                                  |
| Mammals           | Macrophages                                       | MSCs                                              | LPS; LIF; OSM                                                                      | Bone marrow egression; osteogenesis                                                             | Saldaña et al., 2019                                                                                                                                                        |
|                   |                                                   | ISCs                                              | TFs                                                                                | Paneth cell differentiation                                                                     | Sehgal et al., 2018                                                                                                                                                         |
|                   |                                                   | MaSCs                                             | TFs                                                                                | Developing ductal structures and adipose stroma                                                 | Gyorki et al., 2009                                                                                                                                                         |
|                   |                                                   | HSCs                                              | TNF $\alpha$ ; OSM; TLRs                                                           | Proliferation                                                                                   | Baldrige et al., 2011                                                                                                                                                       |
|                   |                                                   | NSCs                                              | Remyelination cytokines; VEGF; IL10; TGF $\beta$                                   | Oligodendrocyte production; differentiation                                                     | Chamberlain et al., 2016                                                                                                                                                    |

BMP, bone morphogenic protein; Dpp, Decapentaplegic; Drpr, Draper; GSCs, germline stem cells; HSCs, hematopoietic stem cells; IL10, interleukin 10; ISCs, intestinal stem cells; LIF, leukemia inhibitory factor; LPS, lipopolysaccharides; Manf, Mesencephalic astrocyte-derived neurotrophic factor; MaSCs, mammary stem cells; MSCs, mesenchymal stem cells; NF- $\kappa$ B, nuclear factor  $\kappa$ B; OSM, oncostatin M; PGRP2, peptidoglycan-recognition protein; TFs, transcription factors; TGF $\beta$ , transforming growth factor beta; TLRs, Toll-like receptors; TNF $\alpha$ , tumor necrosis factor alpha; VEGF, vascular endothelial growth factor.

to secondary infection, primarily through the action of hemocytes (Sadd and Schmid-Hempel, 2006; Rodrigues et al., 2010). These same insects also diversify their antigen receptors in response to recurring infection (Watson et al., 2005; Dong et al., 2006). Combined, the evidence for trained immunity within invertebrates is growing and requires further scientific exploration.

### Deuterostomes

Echinoderms somatically recombine antigen receptors to diversify their response to recurring infections (Pancer, 2000) and other early-branching bilaterian deuterostomes also display such traits. In *Ciona intestinalis*, for example, injection of erythrocytes derived from humans or ducks leads to encapsulation of the cells upon initial

exposure, which induces the activation of morula cells within the animals that quickly encapsulate the cells upon secondary infection (Wright and Cooper, 1975). Jawless lampreys were among the first animals in which trained immunity to recurring infection was appreciated. Lampreys employ recombination of variable lymphocyte receptors (VLRs), diversity of which is generated by alteration of leucine-rich repeats (Pancer et al., 2004), to produce an antigen-specific antibody response upon secondary infection (Finstad and Good, 1964). Such recombination events have become common among jawed vertebrates, although the mechanism changed radically from VLR-based to immunoglobulin (Ig)-based diversity, which is observed in fish, amphibians and amniotes (Gourbal et al., 2018; reviewed by Buckley and Dooley, 2022).

**Box 1. The immune system's role in cell competition**

Cell competition is an evolutionarily conserved physiological process that eliminates undesirable cells from tissues (Morata, 2021). Although cell competition was discovered in *Drosophila*, it is also present in vertebrate animals and appears to play central roles in embryonic development, tissue maintenance, and even cancer (Baker, 2020). Thus, cell competition can be considered as an endogenous surveillance mechanism whereby unfit or outcompeted cells are eliminated based on different patterns of signaling, gene expression and lower growth rates. The elimination of the unfit cells may involve different mechanisms, such as apoptosis and epithelial extrusion (Morata, 2021). Recent research using *Drosophila* implies that surveillance through activation of the Toll pathway may lead to apoptosis of the unfit cells (Meyer et al., 2014; Alpar et al., 2018). This finding is strongly supported by Toll pathway inactivation, which reduces the elimination of unfit cells (Alpar et al., 2018). These intriguing results suggest that components of the innate immune system could be diverted to homeostatic purposes independently of infection and opens the door for further research to identify surveillance signals allowing the identification of unfit cells. Researching these non-traditional immune functions could be useful for studies or early detection of transformed cells and collective analysis of cellular turnover.

**Mammals**

Innate immune cells can also be trained to recognize antigens long-term, termed recurring antigen recognition. Macrophages are responsive to the exposure of host-derived stimuli (e.g. IL1, GM-CSF, TNF $\alpha$  and IFN $\gamma$ ), leading to epigenetic reprogramming of these cells and a quicker response upon secondary exposure (Saeed et al., 2014). Natural killer cells respond to similar stimuli (e.g. LT $\alpha$ , LT $\beta$ , TNF $\alpha$  and IFN $\gamma$ ), which also create an immune memory in these cells (Sun et al., 2012). Although mast and dendritic cells each have the capability for an induced memory response through epigenetic reprogramming, studies addressing this phenomenon are lacking (Hamada et al., 2018). Furthermore, within the central nervous system (CNS), macrophage-derived microglia (reviewed by Kraus et al., 2021; Mehl et al., 2022) display an enhanced secondary immune response after primary exposure to either viruses or bacteria (Mariani and Kielian, 2009; Haley et al., 2019). Interestingly, hematopoietic stem cells (HSCs), which can epigenetically reprogram in response to antigen themselves, can also transfer memory responses to their progeny (Baldrige et al., 2011; Kaufmann et al., 2018), indicating that all HSC-derived innate immune cells are capable of immunological memory.

Trained immunity also occurs in cells outside of the mammalian innate immune system (Hamada et al., 2018). For example, epithelial barrier tissues, formed by parenchymal stem cells, directly respond to environmental exposures immediately and in preparation for future exposure. Once differentiated, these cells are long-term residents of barrier tissues whose 'memories' can be stored longer than that of innate immune cells (Ordovas-Montanes et al., 2020). Along with fibroblasts, this epithelial barrier constitutes the first line of innate immune defense. In mice, primed skin epithelial stem cells respond quicker to wound healing upon a secondary challenge (Naik et al., 2017). Epithelial stem cell memory is long-lived because they turn over on average about once every 2 years (Tunn et al., 1989). Mesenchymal stem cells (MSCs), which can differentiate into osteoblasts, chondrocytes, myocytes and adipocytes, also have trained immunity properties. MSCs produce pro-inflammatory cytokines [e.g. IL8, MCP-1 (also known as CCL2) and IL6] upon secondary exposure to bacterial lipopolysaccharides (LPS) or eukaryotic tumor necrosis factor

(TNF) (Liu et al., 2016). Although MSCs are short-lived, MSC-derived tissue-resident cells can survive for years until replaced (Eggenhofer et al., 2014). Stromal cells also exhibit immunological memory (Crowley et al., 2018); secondary exposure to *Salmonella typhimurium* causes a more rapid response owing to epigenetic modifications (Owens et al., 2013). Similarly, endothelial cells are primed by cytokines to produce IL8 upon secondary exposure (Wolff et al., 1998). Furthermore, stem cells can display immune properties and can be responsible for the generation of immune memory in their progeny, including cells that are not traditionally known for their immune function (Eisenhoffer et al., 2008; Torre et al., 2017). Collectively, innate immune cells and non-immune cells are capable of immune memory, although more research is required.

**The non-immune functions of immune cells in relation to stem cells and regeneration**

Increasing evidence shows that immune cells actively and passively interact with stem cells to regulate stem cell behavior (e.g. cell cycle, differentiation and migration) during development and regeneration (Zhang, 2012; Chung and Son, 2014; Wynn and Vannella, 2016; Abnave and Ghigo, 2019; Arenas Gómez et al., 2020; Ballarin et al., 2021). Below, we describe examples in which the immune cells from various organisms interact and modulate other tissues during regeneration. Other non-immunological functions of the immune system, such as cell competition (Box 1), also appear to be mediated by macrophage-like cells.

**Mammalian macrophages**

Whether the response is local or systemic, macrophages are one of the main effectors of the innate immune response. Macrophages phagocytose pathogens, foreign bodies, dead diseased/tumor cells and/or debris during tissue remodeling (Hirayama et al., 2017). They also perform recruitment and regulatory functions by secreting a range of molecules, chemokines, cytokines and growth factors, which facilitate cellular crosstalk outside of the immune system. Macrophage function and interactions are wide-ranging because different subpopulations exist, depending on the environment, lineage and/or organism (Takahashi et al., 1996; Italiani and Boraschi, 2014). For example, in mammals, the heterogeneity of macrophages can be classed by macrophage location (circulating versus tissue-resident macrophages; reviewed by Cox et al., 2021; Lee and Ginhoux, 2022), polarization state (anti-inflammatory versus pro-inflammatory macrophages versus regulatory macrophages), or developmental origin (Fig. 1) (Williams et al., 2018; Qian et al., 2019). Macrophages interact with stem cells via a variety of factors. We, therefore, suggest that a holistic view of the immune system could reveal that macrophages and other immune components are crucial for regeneration and development (Fig. 2).

**Intestine**

Immune responses in the mammalian intestines have to be tolerant of commensal microbiota and also adequately respond to any harmful pathogens or injury (Macdonald and Monteleone, 2005). Close and continuous interaction between immune cells and molecules with intestinal stem cells (ISCs) is therefore important for regeneration (Mowat and Agace, 2014; Hou et al., 2020). Studies by Biton and colleagues have shown crosstalk between ISCs and immune cells via cytokines, such as IL10, IL13 and IFN, to influence the renewal, differentiation and fate of ISCs (Biton et al., 2018). Additionally, leucine-rich repeat-containing G protein-coupled receptor 5 (Lgr5)-expressing ISCs act as unique

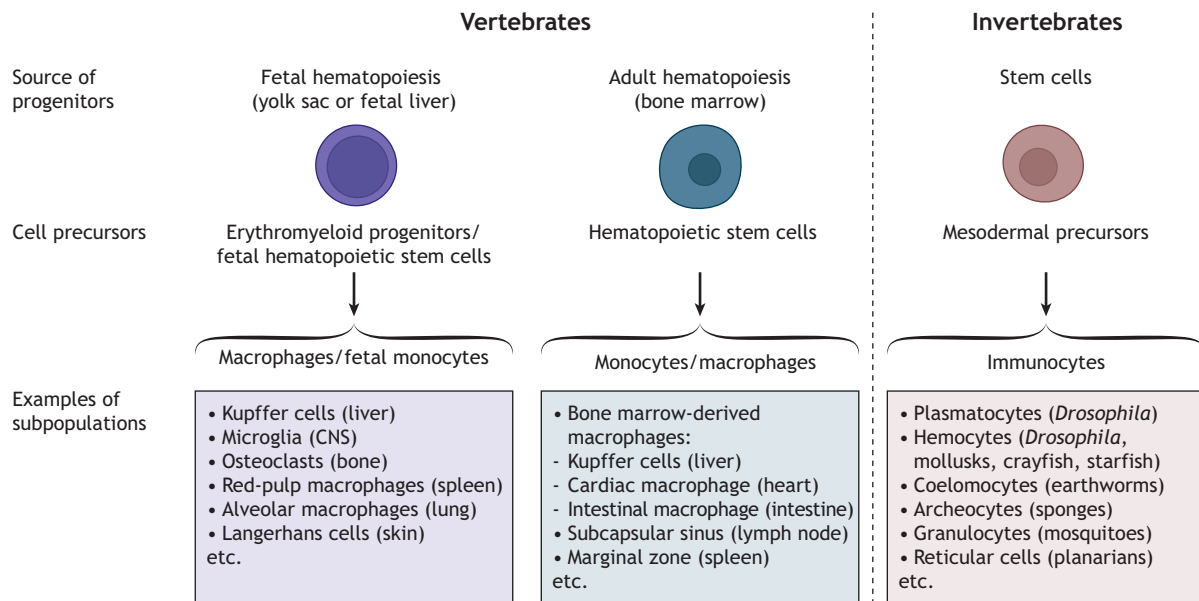

**Fig. 1. Macrophages and macrophage-like cells exist in different forms, states and subpopulations in both vertebrates and invertebrates.** Because of their heterogeneous nature and plasticity, macrophages have a wide range of functions, which might include unique roles specific to their environment. Macrophages in vertebrates originate from the yolk sac and fetal liver during fetal hematopoiesis or the bone marrow during adult hematopoiesis, whereas macrophage-like cells originate from the hematopoietic organs/tissues in invertebrates. Some known examples of macrophages in both vertebrates and invertebrates are shown. Created with BioRender.com.

antigen-presenting cells when interacting with T helper cells, and this interaction impacts epithelial cell differentiation and fate (Sato et al., 2011; Biton et al., 2018). Macrophages are also involved in maintaining this balance; for example, colony-stimulating factor 1 (CSF1)-dependent macrophages regulate intestinal epithelium differentiation; depletion of CSF1R-dependent macrophages affects the differentiation of intestinal epithelial cell lineages, such as Paneth cells, and depletes *Lgr5*<sup>+</sup> ISCs (Sehgal et al., 2018). Thus, several immune cells (such as T cells, innate lymphoid cells, dendritic cells and macrophages), as well as cytokines secreted from these cells, regulate ISCs and are therefore responsible for regenerative functions in the gut.

#### Mammary gland

CSF1 recruits monocytes to the terminal end buds of the mammary glands and promotes monocyte-to-macrophage differentiation (Van Nguyen and Pollard, 2002). Mammary stem cells (MaSCs) also require these macrophages to maintain the stem cell microenvironment (Gouon-Evans et al., 2002); in the absence of these macrophages, the activity and replenishment of the MaSC population are reduced. Morphological defects in the development of mammary ducts, potentially due to negative impacts on putative progenitor cells, also occur when macrophages are absent (Gyorki et al., 2009; Wang et al., 2020).

#### Nervous system

In the nervous system, activation of the proinflammatory response impacts neural stem cell behavior to promote oligodendrocyte production (Carpentier and Palmer, 2009). Recruited macrophages secrete pro-myelination cytokines that drive re-myelination and promote oligodendrocyte differentiation (Kotter et al., 2005; Chamberlain et al., 2016). Conversely, proinflammatory cytokines [e.g. IL6 and transforming growth factor beta (TGFβ)] impair neuroblast proliferation and neurogenesis when chronically over-produced (Aarum et al., 2003; Carpentier and Palmer, 2009). Upon

nervous system injury, M2 macrophages produce cytokines (e.g. IL10 and TGFβ), which induce cell proliferation and angiogenesis to promote tissue regeneration. M2 (polarized) macrophages also secrete vascular endothelial growth factor (VEGF), which maintains endothelial cells necessary for angiogenesis and provides nutrition for nerve tissue repair (Liu et al., 2019). Additionally, increasing the ratio of M2/M1 macrophages promotes nerve repair and increases the number of regenerated axons (Armstrong et al., 2003). Thus, macrophages may instruct integral repair processes of the nervous system.

#### Blood, bone and the cardiovascular system

The immune system also affects hematopoiesis. TNFα, a common pro-inflammatory cytokine, regulates HSC proliferation (Baldrige et al., 2011). In addition, interferon gamma (IFNγ) directs progenitors towards myeloid differentiation, and chronic IFNγ stimulation leads to HSC exhaustion (Orford and Scadden, 2008; Baldrige et al., 2010, 2011). Furthermore, a unique CD169 (SIGLEC1)<sup>+</sup> macrophage population is responsible for HSC retention in the bone marrow and for the ability to discriminate non-self (Chow et al., 2011). In cardiovascular conditions (such as atherosclerosis) macrophages produce TNFα and oncostatin M (OSM), which cause vascular calcification (Guihard et al., 2012). Osteoclasts, tissue-resident macrophages of the bone, also regulate aspects of bone maintenance and formation, especially during inflammatory events and bone injury (reviewed by Yahara et al., 2022).

#### Mesenchyme

MSCs are active participants in the wound-healing phase of inflammation (Freytes et al., 2013). MSCs are activated by the pro-inflammatory signals from monocytes and in turn produce growth factors [e.g. VEGF and platelet-derived growth factor (PDGF)], causing the recruitment of stromal cells, endothelial cells, stem cells and others (Freytes et al., 2013). In a cyclin-dependent

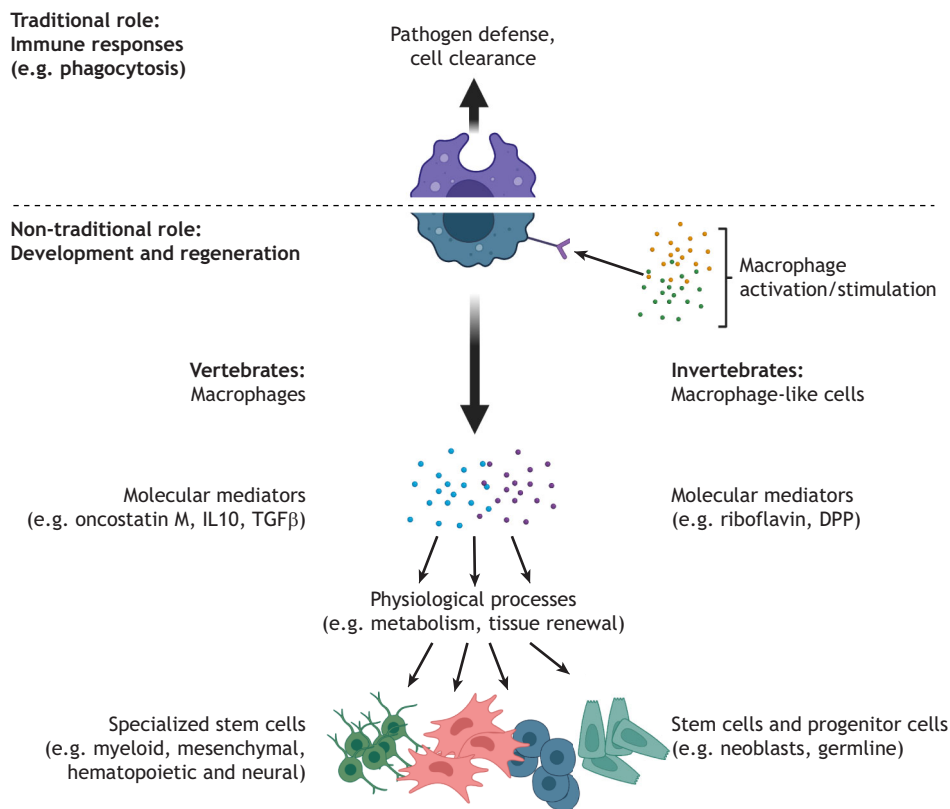

**Fig. 2. Traditional and non-traditional roles of the immune system.** The traditional role of the immune system is to provide defense against pathogens. Highlighted are some of the immune cells (macrophages), immune-associated molecules, and the various stem cells with which they interact in vertebrates (left) and invertebrates (right). Current interpretations of the immune system include non-immune functions and interactions with other cells (such as stem cells) to modulate physiological functions, such as tissue regeneration and repair. Created with BioRender.com.

mechanism, the MSCs, in turn, promote monocytes and macrophages to egress from the bone marrow (Chung and Son, 2014). This crosstalk between MSCs and macrophages is important in tissue repair.

### Macrophages in anamniotes

Interplay between macrophages and regeneration also exists in other vertebrate models. For example, macrophages are involved at different stages of adult zebrafish tail fin regeneration. During the initial stages of tissue regrowth, *mpeg1*<sup>+</sup> macrophages influence the proliferative capacity of the blastema, as well as the length, patterning, branching and bone quality of the caudal fin (Petrie et al., 2014). Additionally, macrophage-derived TNF $\alpha$  controls blastemal cell proliferation during larvae fin remodeling (Nguyen-Chi et al., 2017). In the zebrafish retina, glia cells dedifferentiate to a stem cell-like state, thereby inducing retinal regeneration and repair (reviewed by Becker and Becker, 2022). Moreover, macrophages promote glia or progenitor proliferation and regulate rod cell regeneration kinetics (Wan and Goldman, 2016; White et al., 2017).

In salamander limb regeneration, the early depletion of macrophages causes wound closure and prevents regeneration (Godwin et al., 2013; Zhao et al., 2016). However, macrophage depletion after blastema formation slows limb growth and reduces surface vasculature (Godwin et al., 2013; Zhao et al., 2016; Bolaños-Castro et al., 2021). In the absence of macrophages, the expression of TGF $\beta$ 1 and limb regeneration is also negatively affected (Lévesque et al., 2007). During lens regeneration in both newts and salamanders, the myeloid cell recruitment to initiate regeneration is macrophage dependent (Henry and Tsonis, 2010). Furthermore, in zebrafish and amphibians, similar roles of macrophage involvement have been observed, highlighting that macrophages are a conserved regulatory factor of regeneration.

### Invertebrate immunocytes

In invertebrates, phagocytic and effector roles are also performed by macrophage-like cells or primitive macrophages, sometimes referred to as ‘immunocytes’ (Ottaviani and Franceschi, 1997), that encompass hemocytes, coelomocytes, plasmatocytes and granulocytes, as well as all other cells that serve an equivalent function of vertebrate macrophages (Lavine and Strand, 2002; Abnave et al., 2017) (Fig. 1). Although immunocytes differ in their appearance and location depending on the species, they mediate innate immune responses in many invertebrate organisms (Franchini et al., 1996; Ottaviani, 2011; Abnave et al., 2017). In understanding aspects of the invertebrate immune system, it is important to recognize that there can be additional noncanonical functions, such as modulation of tissue renewal and regeneration.

#### Lophotrochozoa

Beyond their traditional immune functions, immunocytes influence stem cell proliferation and differentiation. In earthworms (*Dendrobaena veneta*), immune-competent coelomocytes play an active role in adult brain regeneration; brain tissue renewal is reduced after the depletion of coelomocytes and coelomocyte-associated molecules, such as riboflavin (Molnar et al., 2015). In mollusks (e.g. *Anodonta woodiana*), bacterial LPS stimulates a pro-inflammatory response involving the production of transcription factors, such as SRY-box transcription factor 2 (SOX2), which are essential in embryonic development, stem cell pluripotency and tissue homeostasis (Zhang and Cui, 2014; Xia et al., 2019).

#### Arthropods

In crayfish, in which neuronal precursors do not self-renew, hemocytes appear to serve as precursors in adult brain neurogenesis (Benton et al., 2014). In *Drosophila*, the cellular immune response is

mediated by hemocytes that primarily serve immune functions, but also interact with other tissues to modulate cellular decisions and tissue repair. Hemocytes secrete Decapentaplegic (Dpp), a TGF $\beta$ /BMP homolog, which induces intestinal stem cell proliferation and maintains basal stem cell activity (Ayyaz et al., 2015; Chakrabarti et al., 2016). Local ovarian hemocytes in *Drosophila* regulate the assembly and homeostasis of germline stem cells (GSCs) because Dpp overexpression disrupts germ cell differentiation (Xie and Spradling, 1998). In addition to Dpp, loss of hemocyte-derived collagen IV during gonad development alters GSC niche organization, indicating that hemocytes are also involved in ovarian tissue morphogenesis (Chen and McKearin, 2003; Van De Bor et al., 2015). Moreover, *Drosophila* retina regeneration is promoted by the hemocyte-derived anti-inflammatory factor mesencephalic astrocyte-derived neurotrophic factor (Manf) (Neves et al., 2016). During wing development and maturation, hemocytes secrete extracellular matrix (ECM) to join the dorsal and ventral wing blades (Kiger et al., 2001; Gold and Brückner, 2015). Hemocytes are also recruited to injury sites following CNS trauma, where they stimulate glial cell proliferation and participate in neural functional recovery (Losada-Pérez et al., 2021). Therefore, hemocytes in *Drosophila*, whether circulating or tissue-resident, facilitate some regenerative processes beyond their expected immunoregulatory functions.

#### Planarians

Flatworm planarians can regenerate the entire body from small tissue segments, owing to an abundance of stem cells (neoblasts). Therefore, it seems logical that stem cells and immune cells engage in an orchestrated process to avoid infection of the open wound while regeneration occurs. The planarian immune response has recently attracted attention because of its antimicrobial properties, which effectively and rapidly clear infection (Abnave et al., 2014; Pang et al., 2016; 2017; Gao et al., 2017a,b; Maciel et al., 2019). This response is achieved by the activation of an evolutionarily conserved innate immune system, capable of clearing pathogenic infections that can be lethal to humans (e.g. *Mycobacterium tuberculosis*, etc.) (Abnave et al., 2014; Peiris et al., 2014; Pang et al., 2016; Gao et al., 2017a,b; Maciel et al., 2019, 2020; Kangale et al., 2021). In addition, the ability to study the whole-body host response to infection provides unique opportunities to obtain comprehensive insights into immune system interactions with other tissues. For example, fungal infection of planarians with *Candida albicans* leads to neoblast hyperproliferation, transcriptional expression of neural genes and increased mucus secretion (Maciel et al., 2019, 2020), suggesting that fungal infection is followed by an integrated response that includes the immune cells, neoblasts and differentiated tissues. Although the sequential order of activation and molecular regulation of this response requires further investigation, evidence in planarians suggests that the immune system cooperates with other cells to enable systemic clearance of fungal pathogens. Furthermore, recent studies analyzing the endogenous microbiota in the planarian *S. mediterranea* have revealed that the innate immune system influences regeneration (Arnold et al., 2016). Activation of the TAK1/MKKK/p38 signaling pathway can either enhance or repress cell death during infection or regeneration, respectively (Arnold et al., 2016). Although how the same signaling pathway drives cell fate in different directions remains poorly understood, these results indicate that the planarian innate immune system can differentiate between infection and tissue repair. Other studies have identified intestinal planarian phagocytes expressing the transcription factor-like nuclear factor  $\kappa$ B (NF- $\kappa$ B),

lack of which causes intestinal tissue lysis when it is knocked down with RNAi (Forsthoefel et al., 2012). Together, the evidence in planarians suggests that the immune system not only clears infections but interacts with other tissues to regulate cellular fate decisions essential for tissue maintenance and repair.

#### Cnidarians

Like planarian, *Hydra* regenerates damaged tissues from a robust population of stem cells. Injury or infection of the *Hydra* results in the removal of infected cells by apoptosis or phagocytosis, induction of antimicrobial peptides (AMPs), wound closure by epithelial cells and reconstruction of the ECM (Reddy et al., 2019). During tissue restoration after injury or infection, immune and regenerative processes are both implemented (Shimizu et al., 2008). However, ongoing work is establishing the molecular and genetic components of these processes. Genetic studies have revealed an upregulation of genes and pathways responsible for phagocytosis, cell death-like MAP kinase signaling and Jun N-terminal kinase (JNK) signaling (Petersen et al., 2015). Interestingly, forkhead box O (FoxO), a transcription factor that drives stem cell renewal, is also involved in the stress response in *Hydra* (Bridge et al., 2010; Boehm et al., 2012). Under stress, FoxO activity is increased via the JNK pathway, which subsequently affects AMP expression (Boehm et al., 2012). Silencing of FoxO expression through shRNAs reduces AMPs expressed in the *Hydra*, establishing a link between stress, stem cells and immunity (Boehm et al., 2012). More research should be devoted to studying the interplay between *Hydra* immunity and regeneration.

#### Conclusion

The immune system is traditionally studied as a dynamic and highly adaptable physiological response to fight pathogens. Here, we draw attention to the notion that immune cells actively and passively influence the function of many tissues, well beyond their traditional roles in immunity. The mechanisms by which the immune system engages with other tissues are diverse and are only beginning to be uncovered. Macrophages appear to be one of the most versatile immune cells, driving bidirectional crosstalk with non-immune cells, including stem and progenitor cells. From the evolutionary perspective, stem cells and other non-adaptive immune cells have non-traditional roles in immunity. They display traits of immune memory and, thus, cells that are not commonly associated with the immune system may fight recurring infections. Overall, the non-traditional aspects of the immune system are an essential component for embryonic development, tissue homeostasis and repair. As such, we advocate for renewed attention to comprehensive analysis underscoring the natural interactions of tissues at the organismal level. These types of studies across model organisms would be instrumental to unleash biomedical advances in different fields encompassing immunotherapy, neuroimmunomodulation and regenerative medicine.

#### Acknowledgements

We thank members of the Grasis and Oviedo labs for insightful discussions and comments on the manuscript.

#### Competing interests

The authors declare no competing or financial interests.

#### Author contributions

Conceptualization: B.N.A., Y.A.I., J.A.G., N.J.O.; Writing – original draft: B.N.A., Y.A.I., J.A.G., N.J.O.; Writing – review & editing: B.N.A., Y.A.I., J.A.G., N.J.O.

## Funding

This work was supported by the National Institute of General Medical Sciences (NIGMS) (R01GM132753 to N.J.O.). The University of California, Merced, School of Natural Sciences provided start-up research funds to J.A.G. Deposited in PMC for release after 12 months.

## References

- Aarum, J., Sandberg, K., Haerberlein, S. L. B. and Persson, M. A. A. (2003). Migration and differentiation of neural precursor cells can be directed by microglia. *Proc. Natl. Acad. Sci. U.S.A.* **100**, 15983-15988. doi:10.1073/pnas.2237050100
- Abnave, P. and Ghigo, E. (2019). Role of the immune system in regeneration and its dynamic interplay with adult stem cells. *Semin. Cell Dev. Biol.* **87**, 160-168. doi:10.1016/j.semcdb.2018.04.002
- Abnave, P., Mottola, G., Gimenez, G., Boucherit, N., Trouplin, V., Torre, C., Conti, F., Ben Amara, A., Lepolard, C., Djian, B. et al. (2014). Screening in planarians identifies MORN2 as a key component in LC3-associated phagocytosis and resistance to bacterial infection. *Cell Host Microbe* **16**, 338-350. doi:10.1016/j.chom.2014.08.002
- Abnave, P., Muracciole, X. and Ghigo, E. (2017). Macrophages in invertebrates: from insects and crustaceans to marine bivalves. *Results Probl. Cell Differ.* **62**, 147-158. doi:10.1007/978-3-319-54090-0\_6
- Alpar, L., Bergantiños, C. and Johnston, L. A. (2018). Spatially restricted regulation of Spätzle/Toll signaling during cell competition. *Dev. Cell* **46**, 706-719.e5. doi:10.1016/j.devcel.2018.08.001
- Arenas Gómez, C. M., Sabin, K. Z. and Echeverri, K. (2020). Wound healing across the animal kingdom: crosstalk between the immune system and the extracellular matrix. *Dev. Dyn.* **249**, 834-846. doi:10.1002/dvdy.178
- Armstrong, B. D., Hu, Z., Abad, C., Yamamoto, M., Rodriguez, W. I., Cheng, J., Tam, J., Gomariz, R. P., Patterson, P. H. and Waschek, J. A. (2003). Lymphocyte regulation of neuropeptide gene expression after neuronal injury. *J. Neurosci. Res.* **74**, 240-247. doi:10.1002/jnr.10750
- Arnold, C. P., Merryman, M. S., Harris-Arnold, A., Mckinney, S. A., Seidel, C. W., Loethen, S., Proctor, K. N., Guo, L. and Sánchez Alvarado, A. (2016). Pathogenic shifts in endogenous microbiota impede tissue regeneration via distinct activation of TAK1/MKK/p38. *eLife* **5**, e16793. doi:10.7554/eLife.16793
- Ayyaz, A., Li, H. and Jasper, H. (2015). Hemocytes control stem cell activity in the *Drosophila* intestine. *Nat. Cell Biol.* **17**, 736-748. doi:10.1038/ncb3174
- Baker, N. E. (2020). Emerging mechanisms of cell competition. *Nat. Rev. Genet.* **21**, 683-697. doi:10.1038/s41576-020-0262-8
- Baldrige, M. T., King, K. Y., Boles, N. C., Weksberg, D. C. and Goodell, M. A. (2010). Quiescent haematopoietic stem cells are activated by IFN-gamma in response to chronic infection. *Nature* **465**, 793-797. doi:10.1038/nature09135
- Baldrige, M. T., King, K. Y. and Goodell, M. A. (2011). Inflammatory signals regulate hematopoietic stem cells. *Trends Immunol.* **32**, 57-65. doi:10.1016/j.it.2010.12.003
- Ballarin, L., Karahan, A., Salvetti, A., Rossi, L., Manni, L., Rinkevich, B., Rosner, A., Voskoboinik, A., Rosental, B., Canesi, L. et al. (2021). Stem cells and innate immunity in aquatic invertebrates: bridging two seemingly disparate disciplines for new discoveries in biology. *Front. Immunol.* **12**, 688106. doi:10.3389/fimmu.2021.688106
- Becker, T. and Becker, C. G. (2022). Regenerative neurogenesis: the integration of developmental, physiological and immune signals. *Development* **149**, dev199907. doi:10.1242/dev.199907
- Benton, J. L., Kery, R., Li, J., Noonin, C., Söderhäll, I. and Beltz, B. S. (2014). Cells from the immune system generate adult-born neurons in crayfish. *Dev. Cell* **30**, 322-333. doi:10.1016/j.devcel.2014.06.016
- Biton, M., Haber, A. L., Rogel, N., Burgin, G., Beyaz, S., Schnell, A., Ashenberg, O., Su, C.-W., Smillie, C., Shekhar, K. et al. (2018). T Helper cell cytokines modulate intestinal stem cell renewal and differentiation. *Cell* **175**, 1307-1320.e22. doi:10.1016/j.cell.2018.10.008
- Boehm, T. and Swann, J. B. (2014). Origin and evolution of adaptive immunity. *Annu. Rev. Anim. Biosci.* **2**, 259-283. doi:10.1146/annurev-animal-022513-114201
- Boehm, A.-M., Khalturin, K., Anton-Erxleben, F., Hemmrich, G., Klostermeier, U. C., Lopez-Quintero, J. A., Oberg, H.-H., Puchert, M., Rosenstiel, P., Wittlieb, J. et al. (2012). FoxO is a critical regulator of stem cell maintenance in immortal Hydra. *Proc. Natl. Acad. Sci. U.S.A.* **109**, 19697-19702. doi:10.1073/pnas.1209714109
- Bolaños-Castro, L. A., Walters, H. E., García Vázquez, R. O. and Yun, M. H. (2021). Immunity in salamander regeneration: Where are we standing and where are we headed? *Dev. Dyn.* **250**, 753-767. doi:10.1002/dvdy.251
- Bosch, T. C. G. (2014). Rethinking the role of immunity: lessons from Hydra. *Trends Immunol.* **35**, 495-502. doi:10.1016/j.it.2014.07.008
- Bosch, T. C. G., Augustin, R., Anton-Erxleben, F., Fraune, S., Hemmrich, G., Zill, H., Rosenstiel, P., Jacobs, G., Schreiber, S., Leippe, M. et al. (2009). Uncovering the evolutionary history of innate immunity: the simple metazoan Hydra uses epithelial cells for host defence. *Dev. Comp. Immunol.* **33**, 559-569. doi:10.1016/j.dci.2008.10.004
- Bridge, D., Theofiles, A. G., Holler, R. L., Marcinkevicius, E., Steele, R. E. and Martáñez, D. E. (2010). FoxO and stress responses in the cnidarian Hydra vulgaris. *PLoS One* **5**, e11686. doi:10.1371/journal.pone.0011686
- Broun, M., Gee, L., Reinhardt, B. and Bode, H. R. (2005). Formation of the head organizer in hydra involves the canonical Wnt pathway. *Development* **132**, 2907-2916. doi:10.1242/dev.01848
- Buckley, K. M. and Dooley, H. (2022). Immunological diversity is a cornerstone of organismal defense and allorecognition across metazoa. *J. Immunol.* **208**, 203-211. doi:10.4049/jimmunol.2100754
- Carpentier, P. A. and Palmer, T. D. (2009). Immune influence on adult neural stem cell regulation and function. *Neuron* **64**, 79-92. doi:10.1016/j.neuron.2009.08.038
- Chakrabarti, S., Dudzic, J. P., Li, X., Collas, E. J., Boquete, J.-P. and Lemaitre, B. (2016). Remote control of intestinal stem cell activity by haemocytes in *Drosophila*. *PLoS Genet.* **12**, e1006089. doi:10.1371/journal.pgen.1006089
- Chamberlain, K. A., Nanesco, S. E., Psachoulia, K. and Huang, J. K. (2016). Oligodendrocyte regeneration: Its significance in myelin replacement and neuroprotection in multiple sclerosis. *Neuropharmacology* **110**(Pt B), 633-643. doi:10.1016/j.neuropharm.2015.10.010
- Chen, D. and Mckearin, D. (2003). Dpp signaling silences bam transcription directly to establish asymmetric divisions of germline stem cells. *Curr. Biol.* **13**, 1786-1791. doi:10.1016/j.cub.2003.09.033
- Chow, A., Lucas, D., Hidalgo, A., Méndez-Ferrer, S., Hashimoto, D., Scheiermann, C., Battista, M., Leboeuf, M., Prophete, C., Van Rooijen, N. et al. (2011). Bone marrow CD169+ macrophages promote the retention of hematopoietic stem and progenitor cells in the mesenchymal stem cell niche. *J. Exp. Med.* **208**, 261-271. doi:10.1084/jem.20101688
- Chung, E. and Son, Y. (2014). Crosstalk between mesenchymal stem cells and macrophages in tissue repair. *Tissue Eng. Regen. Med.* **11**, 431-438. doi:10.1007/s13770-014-0072-1
- Cox, N., Pokrovskii, M., Vicario, R. and Geissmann, F. (2021). Origins, biology, and diseases of tissue macrophages. *Annu. Rev. Immunol.* **39**, 313-344. doi:10.1146/annurev-immunol-093019-111748
- Crowley, T., Buckley, C. D. and Clark, A. R. (2018). Stroma: the forgotten cells of innate immune memory. *Clin. Exp. Immunol.* **193**, 24-36. doi:10.1111/cei.13149
- Dong, Y., Taylor, H. E. and Dimopoulos, G. (2006). AgDscam, a hypervariable immunoglobulin domain-containing receptor of the Anopheles gambiae innate immune system. *PLoS Biol.* **4**, e229. doi:10.1371/journal.pbio.0040229
- Eggenhofer, E., Luk, F., Dahlke, M. H. and Hoogduijn, M. J. (2014). The life and fate of mesenchymal stem cells. *Front. Immunol.* **5**, 148. doi:10.3389/fimmu.2014.00148
- Eisenhoffer, G. T., Kang, H. and Sánchez Alvarado, A. (2008). Molecular analysis of stem cells and their descendants during cell turnover and regeneration in the planarian Schmidtea mediterranea. *Cell Stem Cell* **3**, 327-339. doi:10.1016/j.stem.2008.07.002
- Fanucchi, S., Domínguez-Andrés, J., Joosten, L. A. B., Netea, M. G. and Mhlanga, M. M. (2021). The intersection of epigenetics and metabolism in trained immunity. *Immunity* **54**, 32-43. doi:10.1016/j.immuni.2020.10.011
- Farber, D. L., Netea, M. G., Radbruch, A., Rajewsky, K. and Zinkernagel, R. M. (2016). Immunological memory: lessons from the past and a look to the future. *Nat. Rev. Immunol.* **16**, 124-128. doi:10.1038/nri.2016.13
- Finstad, J. and Good, R. A. (1964). The evolution of the immune response. 3. Immunologic responses in the lamprey. *J. Exp. Med.* **120**, 1151-1168. doi:10.1084/jem.120.6.1151
- Forsthoefel, D. J., James, N. P., Escobar, D. J., Stary, J. M., Vieira, A. P., Waters, F. A. and Newmark, P. A. (2012). An RNAi screen reveals intestinal regulators of branching morphogenesis, differentiation, and stem cell proliferation in planarians. *Dev. Cell* **23**, 691-704. doi:10.1016/j.devcel.2012.09.008
- Franchini, A., Kletsas, D. and Ottaviani, E. (1996). Immunocytochemical evidence of PDGF- and TGF-beta-like molecules in invertebrate and vertebrate immunocytes: an evolutionary approach. *Histochem. J.* **28**, 599-605. doi:10.1007/BF02331380
- Freytes, D. O., Kang, J. W., Marcos-Campos, I. and Vunjak-Novakovic, G. (2013). Macrophages modulate the viability and growth of human mesenchymal stem cells. *J. Cell. Biochem.* **114**, 220-229. doi:10.1002/jcb.24357
- Gao, L., Li, A., Li, N., Liu, X., Deng, H., Zhao, B. and Pang, Q. (2017a). Innate and intrinsic immunity in planarians. *Invertebr. Surviv. J.* **14**, 443-452.
- Gao, L., Han, Y., Deng, H., Hu, W., Zhen, H., Li, N., Qin, N., Yan, M., Wu, W., Liu, B. et al. (2017b). The role of a novel C-type lectin-like protein from planarian in innate immunity and regeneration. *Dev. Comp. Immunol.* **67**, 413-426. doi:10.1016/j.dci.2016.08.010
- Godwin, J. W., Pinto, A. R. and Rosenthal, N. A. (2013). Macrophages are required for adult salamander limb regeneration. *Proc. Natl. Acad. Sci. USA* **110**, 9415-9420. doi:10.1073/pnas.1300290110
- Gold, K. S. and Brückner, K. (2015). Macrophages and cellular immunity in *Drosophila melanogaster*. *Semin. Immunol.* **27**, 357-368. doi:10.1016/j.smim.2016.03.010
- Gouon-Evans, V., Lin, E. Y. and Pollard, J. W. (2002). Requirement of macrophages and eosinophils and their cytokines/chemokines for mammary gland development. *Breast Cancer Res.* **4**, 155-164. doi:10.1186/bcr441

- Gourbal, B., Pinaud, S., Beckers, G. J. M., Van Der Meer, J. W. M., Conrath, U. and Netea, M. G. (2018). Innate immune memory: an evolutionary perspective. *Immunol. Rev.* **283**, 21–40. doi:10.1111/imr.12647
- Guihard, P., Danger, Y., Brounais, B., David, E., Brion, R., Delecric, J., Richards, C., Chevalier, S., Redini, F., Heymann, D. et al. (2012). Induction of osteogenesis in mesenchymal stem cells by activated monocytes/macrophages depends on Oncostatin M signaling. *Bone* **50**, S67. doi:10.1016/j.bone.2012.02.187
- Gyorki, D. E., Asselin-Labat, M.-L., Van Rooijen, N., Lindeman, G. J. and Visvader, J. E. (2009). Resident macrophages influence stem cell activity in the mammary gland. *Breast Cancer Res.* **11**, R62. doi:10.1186/bcr2353
- Haley, M. J., Brough, D., Quintin, J. and Allan, S. M. (2019). Microglial priming as trained immunity in the brain. *Neuroscience*, **405**, 47–54. doi:10.1016/j.neuroscience.2017.12.039
- Hamada, A., Torre, C., Drancourt, M. and Ghigo, E. (2018). Trained immunity carried by non-immune cells. *Front. Microbiol.* **9**, 3225. doi:10.3389/fmicb.2018.03225
- Henry, J. J. and Tsonis, P. A. (2010). Molecular and cellular aspects of amphibian lens regeneration. *Prog. Retin. Eye Res.* **29**, 543–555. doi:10.1016/j.preteyeres.2010.07.002
- Hildemann, W. H., Raison, R. L., Cheung, G., Hull, C. J., Akaka, L. and Okamoto, J. (1977). Immunological specificity and memory in a scleractinian coral. *Nature* **270**, 219–223. doi:10.1038/270219a0
- Hildemann, W. H., Johnson, I. S. and Jokiel, P. L. (1979). Immunocompetence in the lowest metazoan phylum: transplantation immunity in sponges. *Science* **204**, 420–422. doi:10.1126/science.441730
- Hirayama, D., Iida, T. and Nakase, H. (2017). The phagocytic function of macrophage-enforcing innate immunity and tissue homeostasis. *Int. J. Mol. Sci.* **19**, 92. doi:10.3390/ijms19010092
- Hou, Q., Huang, J., Ayansola, H., Masatoshi, H. and Zhang, B. (2020). Intestinal stem cells and immune cell relationships: potential therapeutic targets for inflammatory bowel diseases. *Front. Immunol.* **11**, 623691. doi:10.3389/fimmu.2020.623691
- Italiani, P. and Boraschi, D. (2014). From monocytes to M1/M2 macrophages: phenotypical vs. functional differentiation. *Front. Immunol.* **5**, 514. doi:10.3389/fimmu.2014.00514
- Kachroo, A. and Robin, G. P. (2013). Systemic signaling during plant defense. *Curr. Opin. Plant Biol.* **16**, 527–533. doi:10.1016/j.pbi.2013.06.019
- Kangale, L. J., Raoult, D., Fournier, P.-E., Abnave, P. and Ghigo, E. (2021). Planarians (Platyhelminthes)-an emerging model organism for investigating innate immune mechanisms. *Front. Cell. Infect. Microbiol.* **11**, 619081. doi:10.3389/fcimb.2021.619081
- Kaufmann, E., Sanz, J., Dunn, J. L., Khan, N., Mendonça, L. E., Pacis, A., Tzelepis, F., Pernet, E., Dumaine, A., Grenier, J.-C. et al. (2018). BCG educates hematopoietic stem cells to generate protective innate immunity against tuberculosis. *Cell* **172**, 176–190.e19. doi:10.1016/j.cell.2017.12.031
- Kiger, J. A., Jr, Natzie, J. E. and Green, M. M. (2001). Hemocytes are essential for wing maturation in *Drosophila melanogaster*. *Proc. Natl. Acad. Sci. U.S.A.* **98**, 10190–10195. doi:10.1073/pnas.181338998
- Kotter, M. R., Zhao, C., Van Rooijen, N. and Franklin, R. J. M. (2005). Macrophage-depletion induced impairment of experimental CNS remyelination is associated with a reduced oligodendrocyte progenitor cell response and altered growth factor expression. *Neurobiol. Dis.* **18**, 166–175. doi:10.1016/j.nbd.2004.09.019
- Kraus, A., Buckley, K. M. and Salinas, I. (2021). Sensing the world and its dangers: an evolutionary perspective in neuroimmunology. *eLife* **10**, e66706. doi:10.7554/eLife.66706
- Lange, C., Hemmrich, G., Klostermeier, U. C., Lopez-Quintero, J. A., Miller, D. J., Rahn, T., Weiss, Y., Bosch, T. C. G. and Rosenstiel, P. (2011). Defining the origins of the NOD-like receptor system at the base of animal evolution. *Mol. Biol. Evol.* **28**, 1687–1702. doi:10.1093/molbev/msq349
- Lavine, M. D. and Strand, M. R. (2002). Insect hemocytes and their role in immunity. *Insect Biochem. Mol. Biol.* **32**, 1295–1309. doi:10.1016/S0965-1748(02)00092-9
- Lee, C. Z. W. and Ginhoux, F. (2022). Biology of resident tissue macrophages. *Development* **149**, dev200270. doi:10.1242/dev.200270
- Lévesque, M., Gatien, S., Finnson, K., Desmeules, S., Villiard, E., Pilote, M., Philipp, A. and Roy, S. (2007). Transforming growth factor: beta signaling is essential for limb regeneration in axolotls. *PLoS One* **2**, e1227. doi:10.1371/journal.pone.0001227
- Liu, G.-Y., Liu, Y., Lu, Y., Qin, Y.-R., Di, G.-H., Lei, Y.-H., Liu, H.-X., Li, Y.-Q., Wu, C., Hu, X.-W. et al. (2016). Short-term memory of danger signals or environmental stimuli in mesenchymal stem cells: implications for therapeutic potential. *Cell. Mol. Immunol.* **13**, 369–378. doi:10.1038/cmi.2015.11
- Liu, P., Peng, J., Han, G.-H., Ding, X., Wei, S., Gao, G., Huang, K., Chang, F. and Wang, Y. (2019). Role of macrophages in peripheral nerve injury and repair. *Neural Regen. Res.* **14**, 1335–1342. doi:10.4103/1673-5374.253510
- Losada-Pérez, M., García-Guillén, N. and Casas-Tintó, S. (2021). A novel injury paradigm in the central nervous system of adult *Drosophila*: molecular, cellular and functional aspects. *Dis. Model. Mech.* **14**, dmm044669. doi:10.1242/dmm.044669
- Macdonald, T. T. and Monteleone, G. (2005). Immunity, inflammation, and allergy in the gut. *Science* **307**, 1920–1925. doi:10.1126/science.1106442
- Maciel, E. I., Jiang, C., Barghouth, P. G., Nobile, C. J. and Oviedo, N. J. (2019). The planarian *Schmidtea mediterranea* is a new model to study host-pathogen interactions during fungal infections. *Dev. Comp. Immunol.* **93**, 18–27. doi:10.1016/j.dci.2018.12.005
- Maciel, E. I., Valle Arevalo, A., Ziman, B., Nobile, C. J. and Oviedo, N. J. (2020). Epithelial infection with *Candida albicans* elicits a multi-system response in planarians. *Front. Microbiol.* **11**, 629526. doi:10.3389/fmicb.2020.629526
- Mariani, M. M. and Kielian, T. (2009). Microglia in infectious diseases of the central nervous system. *J. Neuroimmune Pharmacol.* **4**, 448–461. doi:10.1007/s11481-009-9170-6
- Mehl, L. C., Manjally, A. V., Bouadi, O., Gibson, E. M. and Tay, T. L. (2022). Microglia in brain development and regeneration. *Development* **149**, dev200425. doi:10.1242/dev.200425
- Meyer, S. N., Amoyel, M., Bergantiños, C., De La Cova, C., Schertel, C., Basler, K. and Johnston, L. A. (2014). An ancient defense system eliminates unfit cells from developing tissues during cell competition. *Science* **346**, 1258236. doi:10.1126/science.1258236
- Molnar, L., Pollak, E., Skopek, Z., Gutt, E., Kruk, J., Morgan, A. J. and Plytycz, B. (2015). Immune system participates in brain regeneration and restoration of reproduction in the earthworm *Dendrobaena veneta*. *Dev. Comp. Immunol.* **52**, 269–279. doi:10.1016/j.dci.2015.04.001
- Morata, G. (2021). Cell competition: a historical perspective. *Dev. Biol.* **476**, 33–40. doi:10.1016/j.ydbio.2021.02.012
- Mowat, A. M. and Agace, W. W. (2014). Regional specialization within the intestinal immune system. *Nat. Rev. Immunol.* **14**, 667–685. doi:10.1038/nri3738
- Naik, S., Larsen, S. B., Gomez, N. C., Alaverdyan, K., Sandoel, A., Yuan, S., Polak, L., Kulukian, A., Chai, S. and Fuchs, E. (2017). Inflammatory memory sensitizes skin epithelial stem cells to tissue damage. *Nature* **550**, 475–480. doi:10.1038/nature24271
- Netea, M. G., Schlitzer, A., Placek, K., Joosten, L. A. B. and Schultze, J. L. (2019). Innate and adaptive immune memory: an evolutionary continuum in the host's response to pathogens. *Cell Host Microbe* **25**, 13–26. doi:10.1016/j.chom.2018.12.006
- Neves, J., Zhu, J., Sousa-Victor, P., Konjikusic, M., Riley, R., Chew, S., Qi, Y., Jasper, H. and Lamba, D. A. (2016). Immune modulation by MANF promotes tissue repair and regenerative success in the retina. *Science* **353**, aaf3646. doi:10.1126/science.aaf3646
- Nguyen-Chi, M., Laplace-Builhé, B., Travnickova, J., Luz-Crawford, P., Tejedor, G., Lutfalla, G., Kissa, K., Jorgensen, C. and Djouad, F. (2017). TNF signaling and macrophages govern fin regeneration in zebrafish larvae. *Cell Death Dis.* **8**, e2979. doi:10.1038/cddis.2017.374
- Nicholson, L. B. (2016). The immune system. *Essays Biochem.* **60**, 275–301. doi:10.1042/EBC20160017
- Ordovas-Montanes, J., Beyaz, S., Rakoff-Nahoum, S. and Shalek, A. K. (2020). Distribution and storage of inflammatory memory in barrier tissues. *Nat. Rev. Immunol.* **20**, 308–320. doi:10.1038/s41577-019-0263-z
- Orford, K. W. and Scadden, D. T. (2008). Deconstructing stem cell self-renewal: genetic insights into cell-cycle regulation. *Nat. Rev. Genet.* **9**, 115–128. doi:10.1038/nrg2269
- Ottaviani, E. (2011). Immunocyte: the invertebrate counterpart of the vertebrate macrophage. *Invert. Surviv. J.* **8**, 1–4.
- Ottaviani, E. and Franceschi, C. (1997). The invertebrate phagocytic immunocyte: clues to a common evolution of immune and neuroendocrine systems. *Immunol. Today* **18**, 169–174. doi:10.1016/S0167-5699(97)84663-4
- Owens, B., Steevens, T. A. M., Dudek, M., Walcott, D., Sun, M.-Y., Mayer, A., Allan, P. and Simmons, A. (2013). CD90+ Stromal cells are non-professional innate immune effectors of the human colonic mucosa. *Front. Immunol.* **4**, 307. doi:10.3389/fimmu.2013.00307
- Pancer, Z. (2000). Dynamic expression of multiple scavenger receptor cysteine-rich genes in coelomocytes of the purple sea urchin. *Proc. Natl. Acad. Sci. U.S.A.* **97**, 13156–13161. doi:10.1073/pnas.230096397
- Pancer, Z., Amemiya, C. T., Ehrhardt, G. R. A., Ceitlin, J., Larry Gartland, G. and Cooper, M. D. (2004). Somatic diversification of variable lymphocyte receptors in the agnathan sea lamprey. *Nature* **430**, 174–180. doi:10.1038/nature02740
- Pang, Q., Gao, L., Hu, W., An, Y., Deng, H., Zhang, Y., Sun, X., Zhu, G., Liu, B. and Zhao, B. (2016). De Novo transcriptome analysis provides insights into immune related genes and the rig-I-like receptor signaling pathway in the freshwater planarian (*Dugesia japonica*). *PLoS ONE* **11**, e0151597.
- Pang, Q., Gao, L., Bai, Y., Deng, H., Han, Y., Hu, W., Zhang, Y., Yuan, S., Sun, W., Lu, Y. et al. (2017). Identification and characterization of a novel multifunctional placenta specific protein 8 in *Dugesia japonica*. *Gene*, **613**, 1–9. doi:10.1016/j.gene.2017.02.024
- Peiris, T. H., Hoyer, K. K. and Oviedo, N. J. (2014). Innate immune system and tissue regeneration in planarians: an area ripe for exploration. *Semin. Immunol.* **26**, 295–302. doi:10.1016/j.smim.2014.06.005



- Petersen, H. O., Höger, S. K., Looso, M., Lengfeld, T., Kuhn, A., Warnken, U., Nishimiya-Fujisawa, C., Schnölzer, M., Krüger, M., Özbek, S. et al. (2015). A comprehensive transcriptomic and proteomic analysis of hydra head regeneration. *Mol. Biol. Evol.* **32**, 1928-1947. doi:10.1093/molbev/msv079
- Petrie, T. A., Strand, N. S., Tsung-Yang, C., Rabinowitz, J. S. and Moon, R. T. (2014). Macrophages modulate adult zebrafish tail fin regeneration. *Development* **141**, 2581-2591. doi:10.1242/dev.098459
- Pradeu, T. and Du Pasquier, L. (2018). Immunological memory: what's in a name? *Immunol. Rev.* **283**, 7-20. doi:10.1111/imr.12652
- Qian, C., Yun, Z., Yao, Y., Cao, M., Liu, Q., Hu, S., Zhang, S. and Luo, D. (2019). Heterogeneous macrophages: Supersensors of exogenous inducing factors. *Scand. J. Immunol.* **90**, e12768. doi:10.1111/sji.12768
- Reddy, P. C., Gungi, A. and Unni, M. (2019). Cellular and molecular mechanisms of hydra regeneration. *Results Probl. Cell Differ.* **68**, 259-290. doi:10.1007/978-3-030-23459-1\_12
- Reinhardt, B., broun, M., Blitz, I. L. and Bode, H. R. (2004). HyBMP5-8b, a BMP5-8 orthologue, acts during axial patterning and tentacle formation in hydra. *Dev. Biol.* **267**, 43-59. doi:10.1016/j.ydbio.2003.10.031
- Rodrigues, J., Brayner, F. A., Alves, L. C., Dixit, R. and Barillas-Mury, C. (2010). Hemocyte differentiation mediates innate immune memory in *Anopheles gambiae* mosquitoes. *Science* **329**, 1353-1355. doi:10.1126/science.1190689
- Sadd, B. M. and Schmid-Hempel, P. (2006). Insect immunity shows specificity in protection upon secondary pathogen exposure. *Curr. Biol.* **16**, 1206-1210. doi:10.1016/j.cub.2006.04.047
- Saeed, S., Quintin, J., Kerstens, H. H. D., Rao, N. A., Aghajani-farah, A., Matarese, F., Cheng, S.-C., Ratter, J., Berentsen, K., Van Der Ent, M. A. et al. (2014). Epigenetic programming of monocyte-to-macrophage differentiation and trained innate immunity. *Science* **345**, 1251086. doi:10.1126/science.1251086
- Saldaña, L., Bensiamar, F., Vallés, G., Mancebo, F. J., García-Rey, E. and Vilaboa, N. (2019). Immunoregulatory potential of mesenchymal stem cells following activation by macrophage-derived soluble factors. *Stem Cell Res. Ther.* **10**, 58. doi:10.1186/s13287-019-1156-6
- Sato, T., Van Es, J. H., Snippert, H. J., Stange, D. E., Vries, R. G., Van Den Born, M., Barker, N., Shroyer, N. F., Van De Wetering, M. and Clevers, H. (2011). Paneth cells constitute the niche for Lgr5 stem cells in intestinal crypts. *Nature* **469**, 415-418. doi:10.1038/nature09637
- Schröder, K. and Bosch, T. C. G. (2016). The origin of mucosal immunity: lessons from the holobiont hydra. *mBio* **7**, e01184-16. doi:10.1128/mBio.01184-16
- Sehgal, A., Donaldson, D. S., Pridans, C., Sauter, K. A., Hume, D. A. and Mabbott, N. A. (2018). The role of CSF1R-dependent macrophages in control of the intestinal stem-cell niche. *Nat. Commun.* **9**, 1272. doi:10.1038/s41467-018-03638-6
- Shimizu, H., Aufschnaiter, R., Li, L., Sarras, M. P., Borza, D.-B., Abrahamson, D. R., Sado, Y. and Zhang, X. (2008). The extracellular matrix of hydra is a porous sheet and contains type IV collagen. *Zoology* **111**, 410-418. doi:10.1016/j.zool.2007.11.004
- Sun, J. C., Madera, S., Bezman, N. A., Beilke, J. N., Kaplan, M. H. and Lanier, L. L. (2012). Proinflammatory cytokine signaling required for the generation of natural killer cell memory. *J. Exp. Med.* **209**, 947-954. doi:10.1084/jem.20111760
- Takahashi, K., Naito, M. and Takeya, M. (1996). Development and heterogeneity of macrophages and their related cells through their differentiation pathways. *Pathol. Int.* **46**, 473-485. doi:10.1111/j.1440-1827.1996.tb03641.x
- Torre, C., Abnave, P., Tsoumtsas, L. L., Mottola, G., Lepolard, C., Trouplin, V., Gimenez, G., Desrousseaux, J., Gempp, S., Levasseur, A. et al. (2017). *Staphylococcus aureus* promotes Smed-PGRP-2/Smed-setd8-1 methyltransferase signalling in planarian neoblasts to sensitize anti-bacterial gene responses during Re-infection. *EBioMedicine* **20**, 150-160. doi:10.1016/j.ebiom.2017.04.031
- Tunn, S., Nass, R., Ekerkamp, A., Schulze, H. and Krieg, M. (1989). Evaluation of average life span of epithelial and stromal cells of human prostate by superoxide dismutase activity. *Prostate* **15**, 263-271. doi:10.1002/pros.2990150307
- Van De Bor, V., Zimniak, G., Papone, L., Cerezo, D., Malbouyres, M., Juan, T., Ruggiero, F. and Noselli, S. (2015). Companion blood cells control ovarian stem cell niche microenvironment and homeostasis. *Cell Rep.* **13**, 546-560. doi:10.1016/j.celrep.2015.09.008
- Van Nguyen, A. and Pollard, J. W. (2002). Colony stimulating factor-1 is required to recruit macrophages into the mammary gland to facilitate mammary ductal outgrowth. *Dev. Biol.* **247**, 11-25. doi:10.1006/dbio.2002.0669
- Wan, J. and Goldman, D. (2016). Retina regeneration in zebrafish. *Curr. Opin. Genet. Dev.* **40**, 41-47. doi:10.1016/j.gde.2016.05.009
- Wang, Y., Chaffee, T. S., Larue, R. S., Huggins, D. N., Witschen, P. M., Ibrahim, A. M., Nelson, A. C., Machado, H. L. and Schwertfeger, K. L. (2020). Tissue-resident macrophages promote extracellular matrix homeostasis in the mammary gland stroma of nulliparous mice. *eLife* **9**, e57438. doi:10.7554/eLife.57438
- Watson, F. L., Püttmann-Holgado, R., Thomas, F., Lamar, D. L., Hughes, M., Kondo, M., Rebel, V. I. and Schmucker, D. (2005). Extensive diversity of Ig-superfamily proteins in the immune system of insects. *Science* **309**, 1874-1878. doi:10.1126/science.1116887
- Wenger, Y., Buzgariu, W., Reiter, S. and Galliot, B. (2014). Injury-induced immune responses in Hydra. *Semin. Immunol.* **26**, 277-294. doi:10.1016/j.smim.2014.06.004
- White, D. T., Sengupta, S., Saxena, M. T., Xu, Q., Hanes, J., Ding, D., Ji, H. and Mumm, J. S. (2017). Immunomodulation-accelerated neuronal regeneration following selective rod photoreceptor cell ablation in the zebrafish retina. *Proc. Natl. Acad. Sci. U.S.A.* **114**, E3719-E3728. doi:10.1073/pnas.1617721114
- Williams, J. W., Giannarelli, C., Rahman, A., Randolph, G. J. and Kovacic, J. C. (2018). Macrophage biology, classification, and phenotype in cardiovascular disease: JACC macrophage in CVD Series. *J. Am. Coll. Cardiol.* **72**, 2166-2180. doi:10.1016/j.jacc.2018.08.2148
- Wolff, B., Burns, A. R., Middleton, J. and Rot, A. (1998). Endothelial cell "memory" of inflammatory stimulation: human venular endothelial cells store interleukin 8 in Weibel-Palade bodies. *J. Exp. Med.* **188**, 1757-1762. doi:10.1084/jem.188.9.1757
- Wright, R. K. and Cooper, E. L. (1975). Immunological maturation in the tunicate *Ciona intestinalis*. *Am. Zool.* **15**, 21-27. doi:10.1093/icb/15.1.21
- Wynn, T. A. and Vannella, K. M. (2016). Macrophages in tissue repair, regeneration, and fibrosis. *Immunity* **44**, 450-462. doi:10.1016/j.immuni.2016.02.015
- Xie, T. and Spradling, A. C. (1998). Decapentaplegic is essential for the maintenance and division of germline stem cells in the *Drosophila* ovary. *Cell* **94**, 251-260. doi:10.1016/S0092-8674(00)81424-5
- Xia, X., Guan, C., Chen, J., Qiu, M., Qi, J., Wei, M., Wang, X., Zhang, K., Lu, S., Zhang, L. et al. (2019). Molecular characterization of AwSox2 from bivalve *Anodonta woodiana*: Elucidating its player in the immune response. *Innate Immun.* **26**, 381-397. doi:10.1177/1753425919897823
- Yahara, Y., Nguyen, T., Ishikawa, K., Kamei, K. and Alman, B. A. (2022). The origins and roles of osteoclasts in bone development, homeostasis and repair. *Development* **149**, dev199908. doi:10.1242/dev.199908
- Zhang, C. C. (2012). Hematopoietic stem cells: interplay with immunity. *Am. J. Blood Res.* **2**, 219-227.
- Zhang, S. and Cui, W. (2014). Sox2, a key factor in the regulation of pluripotency and neural differentiation. *World J. Stem Cells* **6**, 305-311. doi:10.4252/wjsc.v6.i3.305
- Zhang, Y., Lu, H. and Bargmann, C. I. (2005). Pathogenic bacteria induce aversive olfactory learning in *Caenorhabditis elegans*. *Nature* **438**, 179-184. doi:10.1038/nature04216
- Zhao, A., Qin, H. and Fu, X. (2016). What determines the regenerative capacity in animals? *Bioscience* **66**, 735-746. doi:10.1093/biosci/biw079
